# Supplementary material
Source: MDPI journal article supplement (https://www.mdpi.com/1422-8599/2018/3/1001)
Supplement: s2 [file s2]

InChI=1/3C25H21NO5.C14H15NO2.3C11H8O4.K.H2O/c3*1-2-3-14-30-24-17(15-16-8-4-6-10-19(16)26-24)12-13-20(27)22-23(28)18-9-5-7-11-21(18)31-25(22)29;1-2-3-8-17-14-12(10-16)9-11-6-4-5-7-13(11)15-14;3*1-6(12)9-10(13)7-4-2-3-5-8(7)15-11(9)14;;/h4-13,15,29H,2-3,14H2,1H3;4-13,15,28H,2-3,14H2,1H3;4-13,15,22H,2-3,14H2,1H3;4-7,9-10H,2-3,8H2,1H3;2-5,14H,1H3;2-5,13H,1H3;2-5,9H,1H3;;1H2/q;;;;;;;+1;/p-1/b3*13-12+;;;;;;
AuxInfo=1/1/N:46,45,44,38,16,37,17,39,21,36,18,28,27,43,35,34,29,20,33,26,19,24,25,31,23,32,30,40,41,42,22;94,93,92,86,64,85,65,87,69,84,66,76,75,91,83,82,77,68,81,74,67,72,73,79,71,80,78,88,89,90,70;140,139,138,132,110,131,111,133,115,130,112,122,121,137,129,128,123,114,127,120,113,118,119,125,117,126,124,134,135,136,116;156,155,154,150,149,151,148,153,147,141,146,142,145,143,144,158,152;107,95,96,100,97,106,99,98,103,104,102,108,105,109,101;13,1,2,6,3,12,5,4,9,10,8,14,11,15,7;61,49,50,54,51,60,53,52,57,58,56,62,59,63,55;47;48/rA:158CCCCCCOCCCOCCOOCCCCCCOCCCCCCCOCNCCCCCCCOOOCCCCKOCCCCCCOCCCOCCOOCCCCCCOCCCCCCCOCNCCCCCCCOOOCCCCCCCCCCOCCCOCCOOCCCCCCOCCCCCCCOCNCCCCCCCOOOCCCCCCCNCCCCCCCOCCCCHO/rB:d1;s2;d3;s4;s1d5;s4;s7;s8;s5d9;s10;s9;s12;d12;d8;;d16;s17;d18;s19;s16d20;s19;s22;d23;s20s24;s24;s26;d+27;s28;d26;s29;d31;s32;d33;d29s34;s33;d36;s37;s34d38;d25;s23;s31;s42;s43;s44;s45;;s47;;d49;s50;d51;s52;s49d53;s52;s55;s56;s53s57;d58;s57;s60;d60;d56;;d64;s65;d66;s67;s64d68;s67;s70;s71;s68d72;s72;s74;d+75;s76;d74;s77;d79;s80;d81;d77s82;s81;d84;s85;s82d86;s73;d71;s79;s90;s91;s92;s93;;d95;s96;d97;s98;s95d99;s98;s101;d102;s99s103;d104;s103;s106;d106;s102;;d110;s111;d112;s113;s110d114;s113;s116;s117;s114s118;s118;s120;d+121;s122;d120;s123;d125;s126;d127;d123s128;s127;d130;s131;s128d132;d119;d117;s125;s136;s137;s138;s139;;s141;s142;d143;s144;d145;d142s146;s145;d148;s149;s146d150;s143;s152;s153;s154;s155;s141;d141;/rC:-18.9336,6.2774,0;-18.9336,4.732,0;-17.5953,3.9594,0;-16.2571,4.732,0;-16.2571,6.2774,0;-17.5953,7.05,0;-14.9188,3.9594,0;-13.5805,4.732,0;-13.5805,6.2774,0;-14.9188,7.05,0;-14.9188,8.5953,0;-12.2423,7.05,0;-10.904,6.2774,0;-12.2423,8.5953,0;-12.2423,3.9594,0;15.6199,2.5916,0;15.6199,1.0518,0;16.9536,.2817,0;18.2872,1.0518,0;18.2872,2.5916,0;16.9536,3.3617,0;19.6207,.2817,0;20.9543,1.0518,0;20.9543,2.5916,0;19.6207,3.3617,0;22.288,3.3617,0;23.6217,2.5916,0;24.9553,3.3617,0;26.289,2.5916,0;22.288,4.9016,0;26.289,1.0518,0;27.6226,.2817,0;28.9563,1.0518,0;28.9563,2.5916,0;27.6226,3.3617,0;30.2899,.2817,0;31.6236,1.0518,0;31.6236,2.5916,0;30.2899,3.3617,0;19.6207,4.9016,0;22.288,.2817,0;24.9553,.2817,0;24.9553,-1.2582,0;23.6217,-2.0282,0;23.6217,-3.5681,0;22.288,-4.3381,0;4.7884,3.12,0;6.3283,3.12,0;-31.6504,6.1968,0;-31.6504,4.6515,0;-30.3121,3.8788,0;-28.9737,4.6515,0;-28.9737,6.1968,0;-30.3121,6.9695,0;-27.6356,3.8788,0;-26.2972,4.6515,0;-26.2972,6.1968,0;-27.6356,6.9695,0;-27.6356,8.5148,0;-24.9589,6.9695,0;-23.6207,6.1968,0;-24.9589,8.5148,0;-24.9589,3.8788,0;15.6467,-9.4811,0;15.6467,-11.0212,0;16.9803,-11.7911,0;18.314,-11.0212,0;18.314,-9.4811,0;16.9803,-8.7113,0;19.6477,-11.7911,0;20.9813,-11.0212,0;20.9813,-9.4811,0;19.6477,-8.7113,0;22.3148,-8.7113,0;23.6484,-9.4811,0;24.9821,-8.7113,0;26.3158,-9.4811,0;22.3148,-7.1712,0;26.3158,-11.0212,0;27.6494,-11.7911,0;28.9831,-11.0212,0;28.9831,-9.4811,0;27.6494,-8.7113,0;30.3167,-11.7911,0;31.6504,-11.0212,0;31.6504,-9.4811,0;30.3167,-8.7113,0;19.6477,-7.1712,0;22.3148,-11.7911,0;24.9821,-11.7911,0;24.9821,-13.3311,0;23.6484,-14.101,0;23.6484,-15.6411,0;22.3148,-16.4109,0;-25.2919,-4.5077,0;-25.2919,-6.053,0;-23.9538,-6.8256,0;-22.6154,-6.053,0;-22.6154,-4.5077,0;-23.9538,-3.735,0;-21.2771,-6.8256,0;-19.9389,-6.053,0;-19.9389,-4.5077,0;-21.2771,-3.735,0;-21.2771,-2.1897,0;-18.6006,-3.735,0;-17.2622,-4.5077,0;-18.6006,-2.1897,0;-18.6006,-6.8256,0;15.1638,14.101,0;15.1638,12.5611,0;16.4975,11.7911,0;17.8311,12.5611,0;17.8311,14.101,0;16.4975,14.871,0;19.1648,11.7911,0;20.4982,12.5611,0;20.4982,14.101,0;19.1648,14.871,0;21.8319,14.871,0;23.1656,14.101,0;24.4992,14.871,0;25.8329,14.101,0;21.8319,16.4109,0;25.8329,12.5611,0;27.1665,11.7911,0;28.5002,12.5611,0;28.5002,14.101,0;27.1665,14.871,0;29.8338,11.7911,0;31.1675,12.5611,0;31.1675,14.101,0;29.8338,14.871,0;19.1648,16.4109,0;21.8319,11.7911,0;24.4992,11.7911,0;24.4992,10.2512,0;23.1656,9.4811,0;23.1656,7.9413,0;21.8319,7.1712,0;-3.9122,3.9249,0;-2.5785,3.1551,0;-2.5785,1.615,0;-1.2449,.8451,0;.0888,1.615,0;.0888,3.1551,0;-1.2449,3.9249,0;1.4224,.8451,0;2.7561,1.615,0;2.7561,3.1551,0;1.4224,3.9249,0;-3.9122,.8451,0;-3.9122,-.6949,0;-5.2458,-1.4648,0;-5.2458,-3.0049,0;-6.5793,-3.7747,0;-5.2503,3.1523,0;-3.9122,5.4702,0;
