# Supplementary material
Source: MDPI journal article supplement (https://www.mdpi.com/1422-8599/2018/3/1001)
Supplement: s3 [file s3]

Untitled Document-1
  ChemDraw05251814522D

158170  0  0  0  0  0  0  0  0999 V2000
  -10.1081    3.3513    0.0000 C   0  0  0  0  0  0  0  0  0  0  0  0
  -10.1081    2.5263    0.0000 C   0  0  0  0  0  0  0  0  0  0  0  0
   -9.3936    2.1138    0.0000 C   0  0  0  0  0  0  0  0  0  0  0  0
   -8.6792    2.5263    0.0000 C   0  0  0  0  0  0  0  0  0  0  0  0
   -8.6792    3.3513    0.0000 C   0  0  0  0  0  0  0  0  0  0  0  0
   -9.3936    3.7638    0.0000 C   0  0  0  0  0  0  0  0  0  0  0  0
   -7.9647    2.1138    0.0000 O   0  0  0  0  0  0  0  0  0  0  0  0
   -7.2502    2.5263    0.0000 C   0  0  0  0  0  0  0  0  0  0  0  0
   -7.2502    3.3513    0.0000 C   0  0  0  0  0  0  0  0  0  0  0  0
   -7.9647    3.7638    0.0000 C   0  0  0  0  0  0  0  0  0  0  0  0
   -7.9647    4.5888    0.0000 O   0  0  0  0  0  0  0  0  0  0  0  0
   -6.5358    3.7638    0.0000 C   0  0  0  0  0  0  0  0  0  0  0  0
   -5.8213    3.3513    0.0000 C   0  0  0  0  0  0  0  0  0  0  0  0
   -6.5358    4.5888    0.0000 O   0  0  0  0  0  0  0  0  0  0  0  0
   -6.5358    2.1138    0.0000 O   0  0  0  0  0  0  0  0  0  0  0  0
    8.3390    1.3836    0.0000 C   0  0  0  0  0  0  0  0  0  0  0  0
    8.3390    0.5615    0.0000 C   0  0  0  0  0  0  0  0  0  0  0  0
    9.0510    0.1504    0.0000 C   0  0  0  0  0  0  0  0  0  0  0  0
    9.7630    0.5615    0.0000 C   0  0  0  0  0  0  0  0  0  0  0  0
    9.7630    1.3836    0.0000 C   0  0  0  0  0  0  0  0  0  0  0  0
    9.0510    1.7947    0.0000 C   0  0  0  0  0  0  0  0  0  0  0  0
   10.4749    0.1504    0.0000 O   0  0  0  0  0  0  0  0  0  0  0  0
   11.1869    0.5615    0.0000 C   0  0  0  0  0  0  0  0  0  0  0  0
   11.1869    1.3836    0.0000 C   0  0  0  0  0  0  0  0  0  0  0  0
   10.4749    1.7947    0.0000 C   0  0  0  0  0  0  0  0  0  0  0  0
   11.8989    1.7947    0.0000 C   0  0  0  0  0  0  0  0  0  0  0  0
   12.6109    1.3836    0.0000 C   0  0  0  0  0  0  0  0  0  0  0  0
   13.3229    1.7947    0.0000 C   0  0  0  0  0  0  0  0  0  0  0  0
   14.0349    1.3836    0.0000 C   0  0  0  0  0  0  0  0  0  0  0  0
   11.8989    2.6168    0.0000 O   0  0  0  0  0  0  0  0  0  0  0  0
   14.0349    0.5615    0.0000 C   0  0  0  0  0  0  0  0  0  0  0  0
   14.7469    0.1504    0.0000 N   0  0  0  0  0  0  0  0  0  0  0  0
   15.4589    0.5615    0.0000 C   0  0  0  0  0  0  0  0  0  0  0  0
   15.4589    1.3836    0.0000 C   0  0  0  0  0  0  0  0  0  0  0  0
   14.7469    1.7947    0.0000 C   0  0  0  0  0  0  0  0  0  0  0  0
   16.1709    0.1504    0.0000 C   0  0  0  0  0  0  0  0  0  0  0  0
   16.8829    0.5615    0.0000 C   0  0  0  0  0  0  0  0  0  0  0  0
   16.8829    1.3836    0.0000 C   0  0  0  0  0  0  0  0  0  0  0  0
   16.1709    1.7947    0.0000 C   0  0  0  0  0  0  0  0  0  0  0  0
   10.4749    2.6168    0.0000 O   0  0  0  0  0  0  0  0  0  0  0  0
   11.8989    0.1504    0.0000 O   0  0  0  0  0  0  0  0  0  0  0  0
   13.3229    0.1504    0.0000 O   0  0  0  0  0  0  0  0  0  0  0  0
   13.3229   -0.6717    0.0000 C   0  0  0  0  0  0  0  0  0  0  0  0
   12.6109   -1.0828    0.0000 C   0  0  0  0  0  0  0  0  0  0  0  0
   12.6109   -1.9049    0.0000 C   0  0  0  0  0  0  0  0  0  0  0  0
   11.8989   -2.3160    0.0000 C   0  0  0  0  0  0  0  0  0  0  0  0
    2.5564    1.6657    0.0000 K   0  0  0  0  0  0  0  0  0  0  0  0
    3.3785    1.6657    0.0000 O   0  0  0  0  0  0  0  0  0  0  0  0
  -16.8972    3.3083    0.0000 C   0  0  0  0  0  0  0  0  0  0  0  0
  -16.8972    2.4833    0.0000 C   0  0  0  0  0  0  0  0  0  0  0  0
  -16.1827    2.0708    0.0000 C   0  0  0  0  0  0  0  0  0  0  0  0
  -15.4682    2.4833    0.0000 C   0  0  0  0  0  0  0  0  0  0  0  0
  -15.4682    3.3083    0.0000 C   0  0  0  0  0  0  0  0  0  0  0  0
  -16.1827    3.7208    0.0000 C   0  0  0  0  0  0  0  0  0  0  0  0
  -14.7538    2.0708    0.0000 O   0  0  0  0  0  0  0  0  0  0  0  0
  -14.0393    2.4833    0.0000 C   0  0  0  0  0  0  0  0  0  0  0  0
  -14.0393    3.3083    0.0000 C   0  0  0  0  0  0  0  0  0  0  0  0
  -14.7538    3.7208    0.0000 C   0  0  0  0  0  0  0  0  0  0  0  0
  -14.7538    4.5458    0.0000 O   0  0  0  0  0  0  0  0  0  0  0  0
  -13.3248    3.7208    0.0000 C   0  0  0  0  0  0  0  0  0  0  0  0
  -12.6104    3.3083    0.0000 C   0  0  0  0  0  0  0  0  0  0  0  0
  -13.3248    4.5458    0.0000 O   0  0  0  0  0  0  0  0  0  0  0  0
  -13.3248    2.0708    0.0000 O   0  0  0  0  0  0  0  0  0  0  0  0
    8.3533   -5.0617    0.0000 C   0  0  0  0  0  0  0  0  0  0  0  0
    8.3533   -5.8839    0.0000 C   0  0  0  0  0  0  0  0  0  0  0  0
    9.0653   -6.2949    0.0000 C   0  0  0  0  0  0  0  0  0  0  0  0
    9.7773   -5.8839    0.0000 C   0  0  0  0  0  0  0  0  0  0  0  0
    9.7773   -5.0617    0.0000 C   0  0  0  0  0  0  0  0  0  0  0  0
    9.0653   -4.6507    0.0000 C   0  0  0  0  0  0  0  0  0  0  0  0
   10.4893   -6.2949    0.0000 O   0  0  0  0  0  0  0  0  0  0  0  0
   11.2013   -5.8839    0.0000 C   0  0  0  0  0  0  0  0  0  0  0  0
   11.2013   -5.0617    0.0000 C   0  0  0  0  0  0  0  0  0  0  0  0
   10.4893   -4.6507    0.0000 C   0  0  0  0  0  0  0  0  0  0  0  0
   11.9132   -4.6507    0.0000 C   0  0  0  0  0  0  0  0  0  0  0  0
   12.6252   -5.0617    0.0000 C   0  0  0  0  0  0  0  0  0  0  0  0
   13.3372   -4.6507    0.0000 C   0  0  0  0  0  0  0  0  0  0  0  0
   14.0492   -5.0617    0.0000 C   0  0  0  0  0  0  0  0  0  0  0  0
   11.9132   -3.8285    0.0000 O   0  0  0  0  0  0  0  0  0  0  0  0
   14.0492   -5.8839    0.0000 C   0  0  0  0  0  0  0  0  0  0  0  0
   14.7612   -6.2949    0.0000 N   0  0  0  0  0  0  0  0  0  0  0  0
   15.4732   -5.8839    0.0000 C   0  0  0  0  0  0  0  0  0  0  0  0
   15.4732   -5.0617    0.0000 C   0  0  0  0  0  0  0  0  0  0  0  0
   14.7612   -4.6507    0.0000 C   0  0  0  0  0  0  0  0  0  0  0  0
   16.1852   -6.2949    0.0000 C   0  0  0  0  0  0  0  0  0  0  0  0
   16.8972   -5.8839    0.0000 C   0  0  0  0  0  0  0  0  0  0  0  0
   16.8972   -5.0617    0.0000 C   0  0  0  0  0  0  0  0  0  0  0  0
   16.1852   -4.6507    0.0000 C   0  0  0  0  0  0  0  0  0  0  0  0
   10.4893   -3.8285    0.0000 O   0  0  0  0  0  0  0  0  0  0  0  0
   11.9132   -6.2949    0.0000 O   0  0  0  0  0  0  0  0  0  0  0  0
   13.3372   -6.2949    0.0000 O   0  0  0  0  0  0  0  0  0  0  0  0
   13.3372   -7.1171    0.0000 C   0  0  0  0  0  0  0  0  0  0  0  0
   12.6252   -7.5281    0.0000 C   0  0  0  0  0  0  0  0  0  0  0  0
   12.6252   -8.3503    0.0000 C   0  0  0  0  0  0  0  0  0  0  0  0
   11.9132   -8.7613    0.0000 C   0  0  0  0  0  0  0  0  0  0  0  0
  -13.5026   -2.4065    0.0000 C   0  0  0  0  0  0  0  0  0  0  0  0
  -13.5026   -3.2315    0.0000 C   0  0  0  0  0  0  0  0  0  0  0  0
  -12.7882   -3.6440    0.0000 C   0  0  0  0  0  0  0  0  0  0  0  0
  -12.0737   -3.2315    0.0000 C   0  0  0  0  0  0  0  0  0  0  0  0
  -12.0737   -2.4065    0.0000 C   0  0  0  0  0  0  0  0  0  0  0  0
  -12.7882   -1.9940    0.0000 C   0  0  0  0  0  0  0  0  0  0  0  0
  -11.3592   -3.6440    0.0000 O   0  0  0  0  0  0  0  0  0  0  0  0
  -10.6448   -3.2315    0.0000 C   0  0  0  0  0  0  0  0  0  0  0  0
  -10.6448   -2.4065    0.0000 C   0  0  0  0  0  0  0  0  0  0  0  0
  -11.3592   -1.9940    0.0000 C   0  0  0  0  0  0  0  0  0  0  0  0
  -11.3592   -1.1690    0.0000 O   0  0  0  0  0  0  0  0  0  0  0  0
   -9.9303   -1.9940    0.0000 C   0  0  0  0  0  0  0  0  0  0  0  0
   -9.2158   -2.4065    0.0000 C   0  0  0  0  0  0  0  0  0  0  0  0
   -9.9303   -1.1690    0.0000 O   0  0  0  0  0  0  0  0  0  0  0  0
   -9.9303   -3.6440    0.0000 O   0  0  0  0  0  0  0  0  0  0  0  0
    8.0955    7.5281    0.0000 C   0  0  0  0  0  0  0  0  0  0  0  0
    8.0955    6.7060    0.0000 C   0  0  0  0  0  0  0  0  0  0  0  0
    8.8075    6.2949    0.0000 C   0  0  0  0  0  0  0  0  0  0  0  0
    9.5195    6.7060    0.0000 C   0  0  0  0  0  0  0  0  0  0  0  0
    9.5195    7.5281    0.0000 C   0  0  0  0  0  0  0  0  0  0  0  0
    8.8075    7.9392    0.0000 C   0  0  0  0  0  0  0  0  0  0  0  0
   10.2315    6.2949    0.0000 O   0  0  0  0  0  0  0  0  0  0  0  0
   10.9434    6.7060    0.0000 C   0  0  0  0  0  0  0  0  0  0  0  0
   10.9434    7.5281    0.0000 C   0  0  0  0  0  0  0  0  0  0  0  0
   10.2315    7.9392    0.0000 C   0  0  0  0  0  0  0  0  0  0  0  0
   11.6554    7.9392    0.0000 C   0  0  0  0  0  0  0  0  0  0  0  0
   12.3674    7.5281    0.0000 C   0  0  0  0  0  0  0  0  0  0  0  0
   13.0794    7.9392    0.0000 C   0  0  0  0  0  0  0  0  0  0  0  0
   13.7914    7.5281    0.0000 C   0  0  0  0  0  0  0  0  0  0  0  0
   11.6554    8.7613    0.0000 O   0  0  0  0  0  0  0  0  0  0  0  0
   13.7914    6.7060    0.0000 C   0  0  0  0  0  0  0  0  0  0  0  0
   14.5034    6.2949    0.0000 N   0  0  0  0  0  0  0  0  0  0  0  0
   15.2154    6.7060    0.0000 C   0  0  0  0  0  0  0  0  0  0  0  0
   15.2154    7.5281    0.0000 C   0  0  0  0  0  0  0  0  0  0  0  0
   14.5034    7.9392    0.0000 C   0  0  0  0  0  0  0  0  0  0  0  0
   15.9274    6.2949    0.0000 C   0  0  0  0  0  0  0  0  0  0  0  0
   16.6394    6.7060    0.0000 C   0  0  0  0  0  0  0  0  0  0  0  0
   16.6394    7.5281    0.0000 C   0  0  0  0  0  0  0  0  0  0  0  0
   15.9274    7.9392    0.0000 C   0  0  0  0  0  0  0  0  0  0  0  0
   10.2315    8.7613    0.0000 O   0  0  0  0  0  0  0  0  0  0  0  0
   11.6554    6.2949    0.0000 O   0  0  0  0  0  0  0  0  0  0  0  0
   13.0794    6.2949    0.0000 O   0  0  0  0  0  0  0  0  0  0  0  0
   13.0794    5.4728    0.0000 C   0  0  0  0  0  0  0  0  0  0  0  0
   12.3674    5.0617    0.0000 C   0  0  0  0  0  0  0  0  0  0  0  0
   12.3674    4.2396    0.0000 C   0  0  0  0  0  0  0  0  0  0  0  0
   11.6554    3.8285    0.0000 C   0  0  0  0  0  0  0  0  0  0  0  0
   -2.0886    2.0954    0.0000 C   0  0  0  0  0  0  0  0  0  0  0  0
   -1.3766    1.6844    0.0000 C   0  0  0  0  0  0  0  0  0  0  0  0
   -1.3766    0.8622    0.0000 C   0  0  0  0  0  0  0  0  0  0  0  0
   -0.6646    0.4512    0.0000 N   0  0  0  0  0  0  0  0  0  0  0  0
    0.0474    0.8622    0.0000 C   0  0  0  0  0  0  0  0  0  0  0  0
    0.0474    1.6844    0.0000 C   0  0  0  0  0  0  0  0  0  0  0  0
   -0.6646    2.0954    0.0000 C   0  0  0  0  0  0  0  0  0  0  0  0
    0.7594    0.4512    0.0000 C   0  0  0  0  0  0  0  0  0  0  0  0
    1.4714    0.8622    0.0000 C   0  0  0  0  0  0  0  0  0  0  0  0
    1.4714    1.6844    0.0000 C   0  0  0  0  0  0  0  0  0  0  0  0
    0.7594    2.0954    0.0000 C   0  0  0  0  0  0  0  0  0  0  0  0
   -2.0886    0.4512    0.0000 O   0  0  0  0  0  0  0  0  0  0  0  0
   -2.0886   -0.3710    0.0000 C   0  0  0  0  0  0  0  0  0  0  0  0
   -2.8006   -0.7820    0.0000 C   0  0  0  0  0  0  0  0  0  0  0  0
   -2.8006   -1.6042    0.0000 C   0  0  0  0  0  0  0  0  0  0  0  0
   -3.5125   -2.0152    0.0000 C   0  0  0  0  0  0  0  0  0  0  0  0
   -2.8030    1.6829    0.0000 H   0  0  0  0  0  0  0  0  0  0  0  0
   -2.0886    2.9204    0.0000 O   0  0  0  0  0  0  0  0  0  0  0  0
  1  2  2  0      
  2  3  1  0      
  3  4  2  0      
  4  5  1  0      
  5  6  2  0      
  6  1  1  0      
  4  7  1  0      
  7  8  1  0      
  8  9  1  0      
  9 10  2  0      
 10  5  1  0      
 10 11  1  0      
  9 12  1  0      
 12 13  1  0      
 12 14  2  0      
  8 15  2  0      
 16 17  2  0      
 17 18  1  0      
 18 19  2  0      
 19 20  1  0      
 20 21  2  0      
 21 16  1  0      
 19 22  1  0      
 22 23  1  0      
 23 24  2  0      
 24 25  1  0      
 25 20  1  0      
 24 26  1  0      
 26 27  1  0      
 27 28  2  0      
 28 29  1  0      
 26 30  2  0      
 29 31  1  0      
 31 32  2  0      
 32 33  1  0      
 33 34  2  0      
 34 35  1  0      
 35 29  2  0      
 33 36  1  0      
 36 37  2  0      
 37 38  1  0      
 38 39  2  0      
 39 34  1  0      
 25 40  2  0      
 23 41  1  0      
 31 42  1  0      
 42 43  1  0      
 43 44  1  0      
 44 45  1  0      
 45 46  1  0      
 47 48  1  0      
 49 50  2  0      
 50 51  1  0      
 51 52  2  0      
 52 53  1  0      
 53 54  2  0      
 54 49  1  0      
 52 55  1  0      
 55 56  1  0      
 56 57  1  0      
 57 58  1  0      
 58 53  1  0      
 58 59  2  0      
 57 60  1  0      
 60 61  1  0      
 60 62  2  0      
 56 63  2  0      
 64 65  2  0      
 65 66  1  0      
 66 67  2  0      
 67 68  1  0      
 68 69  2  0      
 69 64  1  0      
 67 70  1  0      
 70 71  1  0      
 71 72  1  0      
 72 73  2  0      
 73 68  1  0      
 72 74  1  0      
 74 75  1  0      
 75 76  2  0      
 76 77  1  0      
 74 78  2  0      
 77 79  1  0      
 79 80  2  0      
 80 81  1  0      
 81 82  2  0      
 82 83  1  0      
 83 77  2  0      
 81 84  1  0      
 84 85  2  0      
 85 86  1  0      
 86 87  2  0      
 87 82  1  0      
 73 88  1  0      
 71 89  2  0      
 79 90  1  0      
 90 91  1  0      
 91 92  1  0      
 92 93  1  0      
 93 94  1  0      
 95 96  2  0      
 96 97  1  0      
 97 98  2  0      
 98 99  1  0      
 99100  2  0      
100 95  1  0      
 98101  1  0      
101102  1  0      
102103  2  0      
103104  1  0      
104 99  1  0      
104105  2  0      
103106  1  0      
106107  1  0      
106108  2  0      
102109  1  0      
110111  2  0      
111112  1  0      
112113  2  0      
113114  1  0      
114115  2  0      
115110  1  0      
113116  1  0      
116117  1  0      
117118  1  0      
118119  1  0      
119114  1  0      
118120  1  0      
120121  1  0      
121122  2  0      
122123  1  0      
120124  2  0      
123125  1  0      
125126  2  0      
126127  1  0      
127128  2  0      
128129  1  0      
129123  2  0      
127130  1  0      
130131  2  0      
131132  1  0      
132133  2  0      
133128  1  0      
119134  2  0      
117135  2  0      
125136  1  0      
136137  1  0      
137138  1  0      
138139  1  0      
139140  1  0      
141142  1  0      
142143  1  0      
143144  2  0      
144145  1  0      
145146  2  0      
146147  1  0      
147142  2  0      
145148  1  0      
148149  2  0      
149150  1  0      
150151  2  0      
151146  1  0      
143152  1  0      
152153  1  0      
153154  1  0      
154155  1  0      
155156  1  0      
141157  1  0      
141158  2  0      
V   16 5
V   17 2
V   18 3
V   19 4
V   20 1a
V   21 6
V   22 7
V   23 8
V   24 9
V   25 1
V   26 11
V   27 12
V   28 13
V   29 14
V   30 15
V   31 16
V   32 17
V   33 18
V   34 19
V   35 20
V   36 21
V   37 22
V   38 23
V   39 24
V   64 2a
V   65 2a
V   66 2a
V   67 2a
V   68 1
V   69 2a
V   70 5
V   71 4
V   72 3
V   73 6
V   74 2
V   75 12
V   76 13
V   77 14
V   78 15
V   79 16
V   80 17
V   81 18
V   82 21
V   83 19
V   84 21
V   85 22
V   86 25
V   87 23
V  110 2a
V  111 2a
V  112 2a
V  113 2a
V  114 1
V  115 2a
V  116 5
V  117 4
V  118 3
V  119 6
V  120 2
V  121 12
V  122 13
V  123 14
V  124 15
V  125 16
V  126 17
V  127 18
V  128 21
V  129 19
V  130 21
V  131 22
V  132 25
V  133 23
V  141 13
V  142 14
V  143 16
V  144 17
V  145 18
V  146 21
V  147 19
V  148 21
V  149 22
V  150 25
V  151 23
M  STY  1   1 SUP
M  SLB  1   1   1
M  SAL   1  2  47  48
M  SMT   1 KOH
M  STY  1   2 GEN
M  SLB  1   2   2
M  SAL   2 15   1   2   3   4   5   6   7   8   9  10  11  12  13  14  15
M  SAL   2 15  49  50  51  52  53  54  55  56  57  58  59  60  61  62  63
M  SAL   2 15  95  96  97  98  99 100 101 102 103 104 105 106 107 108 109
M  SDI   2  4  -17.4942   -5.0232  -17.4942    5.2773
M  SDI   2  4   -5.0901    5.3202   -5.0901   -4.9573
M  END
