# Supplementary material
Source: MDPI journal article supplement (https://www.mdpi.com/1422-8599/2018/3/1001)
Supplement: s4 [file s4]

InChI=1/3C25H21NO5.C14H15NO2.3C11H8O4.K.H2O/c3*1-2-3-14-30-24-17(15-16-8-4-6-10-19(16)26-24)12-13-20(27)22-23(28)18-9-5-7-11-21(18)31-25(22)29;1-2-3-8-17-14-12(10-16)9-11-6-4-5-7-13(11)15-14;3*1-6(12)9-10(13)7-4-2-3-5-8(7)15-11(9)14;;/h4-13,15,29H,2-3,14H2,1H3;4-13,15,28H,2-3,14H2,1H3;4-13,15,22H,2-3,14H2,1H3;4-7,9-10H,2-3,8H2,1H3;2-5,14H,1H3;2-5,13H,1H3;2-5,9H,1H3;;1H2/q;;;;;;;+1;/p-1/b3*13-12+;;;;;;
AuxInfo=1/1/N:46,45,44,38,16,37,17,39,21,36,18,28,27,43,35,34,29,20,33,26,19,24,25,31,23,32,30,40,41,42,22;94,93,92,86,64,85,65,87,69,84,66,76,75,91,83,82,77,68,81,74,67,72,73,79,71,80,78,88,89,90,70;140,139,138,132,110,131,111,133,115,130,112,122,121,137,129,128,123,114,127,120,113,118,119,125,117,126,124,134,135,136,116;156,155,154,150,149,151,148,153,147,141,146,142,145,143,144,158,152;107,95,96,100,97,106,99,98,103,104,102,108,105,109,101;13,1,2,6,3,12,5,4,9,10,8,14,11,15,7;61,49,50,54,51,60,53,52,57,58,56,62,59,63,55;47;48/rA:158CCCCCCOCCCOCCOOCCCCCCOCCCCCCCOCNCCCCCCCOOOCCCCKOCCCCCCOCCCOCCOOCCCCCCOCCCCCCCOCNCCCCCCCOOOCCCCCCCCCCOCCCOCCOOCCCCCCOCCCCCCCOCNCCCCCCCOOOCCCCCCCNCCCCCCCOCCCCHO/rB:d1;s2;d3;s4;s1d5;s4;s7;s8;s5d9;s10;s9;s12;d12;d8;;d16;s17;d18;s19;s16d20;s19;s22;d23;s20s24;s24;s26;d+27;s28;d26;s29;d31;s32;d33;d29s34;s33;d36;s37;s34d38;d25;s23;s31;s42;s43;s44;s45;;s47;;d49;s50;d51;s52;s49d53;s52;s55;s56;s53s57;d58;s57;s60;d60;d56;;d64;s65;d66;s67;s64d68;s67;s70;s71;s68d72;s72;s74;d+75;s76;d74;s77;d79;s80;d81;d77s82;s81;d84;s85;s82d86;s73;d71;s79;s90;s91;s92;s93;;d95;s96;d97;s98;s95d99;s98;s101;d102;s99s103;d104;s103;s106;d106;s102;;d110;s111;d112;s113;s110d114;s113;s116;s117;s114s118;s118;s120;d+121;s122;d120;s123;d125;s126;d127;d123s128;s127;d130;s131;s128d132;d119;d117;s125;s136;s137;s138;s139;;s141;s142;d143;s144;d145;d142s146;s145;d148;s149;s146d150;s143;s152;s153;s154;s155;s141;d141;/rC:-18.9342,6.2775,0;-18.9342,4.7322,0;-17.5959,3.9595,0;-16.2576,4.7322,0;-16.2576,6.2775,0;-17.5959,7.0502,0;-14.9192,3.9595,0;-13.5809,4.7322,0;-13.5809,6.2775,0;-14.9192,7.0502,0;-14.9192,8.5956,0;-12.2426,7.0502,0;-10.9043,6.2775,0;-12.2426,8.5956,0;-12.2426,3.9595,0;15.6203,2.5917,0;15.6203,1.0517,0;16.954,.2817,0;18.2877,1.0517,0;18.2877,2.5917,0;16.954,3.3617,0;19.6213,.2817,0;20.955,1.0517,0;20.955,2.5917,0;19.6213,3.3617,0;22.2887,3.3617,0;23.6224,2.5917,0;24.9561,3.3617,0;26.2897,2.5917,0;22.2887,4.9017,0;26.2897,1.0517,0;27.6234,.2817,0;28.9571,1.0517,0;28.9571,2.5917,0;27.6234,3.3617,0;30.2908,.2817,0;31.6245,1.0517,0;31.6245,2.5917,0;30.2908,3.3617,0;19.6213,4.9017,0;22.2887,.2817,0;24.9561,.2817,0;24.9561,-1.2583,0;23.6224,-2.0283,0;23.6224,-3.5683,0;22.2887,-4.3383,0;4.7885,3.1202,0;6.3285,3.1202,0;-31.6513,6.197,0;-31.6513,4.6517,0;-30.313,3.879,0;-28.9746,4.6517,0;-28.9746,6.197,0;-30.313,6.9697,0;-27.6363,3.879,0;-26.298,4.6517,0;-26.298,6.197,0;-27.6363,6.9697,0;-27.6363,8.5151,0;-24.9597,6.9697,0;-23.6213,6.197,0;-24.9597,8.5151,0;-24.9597,3.879,0;15.6471,-9.4815,0;15.6471,-11.0215,0;16.9808,-11.7915,0;18.3145,-11.0215,0;18.3145,-9.4815,0;16.9808,-8.7115,0;19.6482,-11.7915,0;20.9819,-11.0215,0;20.9819,-9.4815,0;19.6482,-8.7115,0;22.3155,-8.7115,0;23.6492,-9.4815,0;24.9829,-8.7115,0;26.3166,-9.4815,0;22.3155,-7.1715,0;26.3166,-11.0215,0;27.6502,-11.7915,0;28.9839,-11.0215,0;28.9839,-9.4815,0;27.6502,-8.7115,0;30.3176,-11.7915,0;31.6513,-11.0215,0;31.6513,-9.4815,0;30.3176,-8.7115,0;19.6482,-7.1715,0;22.3155,-11.7915,0;24.9829,-11.7915,0;24.9829,-13.3315,0;23.6492,-14.1015,0;23.6492,-15.6415,0;22.3155,-16.4115,0;-25.2927,-4.5078,0;-25.2927,-6.0532,0;-23.9544,-6.8259,0;-22.6161,-6.0532,0;-22.6161,-4.5078,0;-23.9544,-3.7352,0;-21.2778,-6.8259,0;-19.9394,-6.0532,0;-19.9394,-4.5078,0;-21.2778,-3.7352,0;-21.2778,-2.1898,0;-18.6011,-3.7352,0;-17.2628,-4.5078,0;-18.6011,-2.1898,0;-18.6011,-6.8259,0;15.1642,14.1015,0;15.1642,12.5615,0;16.4979,11.7915,0;17.8316,12.5615,0;17.8316,14.1015,0;16.4979,14.8715,0;19.1652,11.7915,0;20.4989,12.5615,0;20.4989,14.1015,0;19.1652,14.8715,0;21.8326,14.8715,0;23.1663,14.1015,0;24.5,14.8715,0;25.8336,14.1015,0;21.8326,16.4115,0;25.8336,12.5615,0;27.1673,11.7915,0;28.501,12.5615,0;28.501,14.1015,0;27.1673,14.8715,0;29.8347,11.7915,0;31.1684,12.5615,0;31.1684,14.1015,0;29.8347,14.8715,0;19.1652,16.4115,0;21.8326,11.7915,0;24.5,11.7915,0;24.5,10.2515,0;23.1663,9.4815,0;23.1663,7.9415,0;21.8326,7.1715,0;-3.9122,3.9251,0;-2.5785,3.1551,0;-2.5785,1.6151,0;-1.2449,.8451,0;.0888,1.6151,0;.0888,3.1551,0;-1.2449,3.9251,0;1.4225,.8451,0;2.7562,1.6151,0;2.7562,3.1551,0;1.4225,3.9251,0;-3.9122,.8451,0;-3.9122,-.6949,0;-5.2459,-1.4649,0;-5.2459,-3.0049,0;-6.5796,-3.7749,0;-5.2506,3.1524,0;-3.9122,5.4705,0;
