# Supplementary material
Source: MDPI journal article supplement (https://www.mdpi.com/1422-8599/2018/3/1001)
Supplement: s5 [file s5]

Untitled Document-1
  ChemDraw05251815222D

  0  0  0     0  0              0 V3000
M  V30 BEGIN CTAB
M  V30 COUNTS 158 170 2 0 0
M  V30 BEGIN ATOM
M  V30 1 C -10.108115 3.351283 0.000000 0
M  V30 2 C -10.108115 2.526283 0.000000 0
M  V30 3 C -9.393644 2.113783 0.000000 0
M  V30 4 C -8.679173 2.526283 0.000000 0
M  V30 5 C -8.679173 3.351283 0.000000 0
M  V30 6 C -9.393644 3.763783 0.000000 0
M  V30 7 O -7.964702 2.113783 0.000000 0
M  V30 8 C -7.250231 2.526283 0.000000 0
M  V30 9 C -7.250231 3.351283 0.000000 0
M  V30 10 C -7.964702 3.763783 0.000000 0
M  V30 11 O -7.964702 4.588783 0.000000 0
M  V30 12 C -6.535760 3.763783 0.000000 0
M  V30 13 C -5.821289 3.351283 0.000000 0
M  V30 14 O -6.535760 4.588783 0.000000 0
M  V30 15 O -6.535760 2.113783 0.000000 0
M  V30 16 C 8.338971 1.383594 0.000000 0
M  V30 17 C 8.338971 0.561459 0.000000 0
M  V30 18 C 9.050963 0.150391 0.000000 0
M  V30 19 C 9.762953 0.561459 0.000000 0
M  V30 20 C 9.762953 1.383594 0.000000 0
M  V30 21 C 9.050963 1.794662 0.000000 0
M  V30 22 O 10.474943 0.150391 0.000000 0
M  V30 23 C 11.186934 0.561459 0.000000 0
M  V30 24 C 11.186934 1.383594 0.000000 0
M  V30 25 C 10.474943 1.794662 0.000000 0
M  V30 26 C 11.898924 1.794662 0.000000 0
M  V30 27 C 12.610914 1.383594 0.000000 0
M  V30 28 C 13.322905 1.794662 0.000000 0
M  V30 29 C 14.034896 1.383594 0.000000 0
M  V30 30 O 11.898924 2.616798 0.000000 0
M  V30 31 C 14.034896 0.561459 0.000000 0
M  V30 32 N 14.746886 0.150391 0.000000 0
M  V30 33 C 15.458877 0.561459 0.000000 0
M  V30 34 C 15.458877 1.383594 0.000000 0
M  V30 35 C 14.746886 1.794662 0.000000 0
M  V30 36 C 16.170867 0.150391 0.000000 0
M  V30 37 C 16.882857 0.561459 0.000000 0
M  V30 38 C 16.882857 1.383594 0.000000 0
M  V30 39 C 16.170867 1.794662 0.000000 0
M  V30 40 O 10.474943 2.616798 0.000000 0
M  V30 41 O 11.898924 0.150391 0.000000 0
M  V30 42 O 13.322905 0.150391 0.000000 0
M  V30 43 C 13.322905 -0.671745 0.000000 0
M  V30 44 C 12.610914 -1.082813 0.000000 0
M  V30 45 C 12.610914 -1.904949 0.000000 0
M  V30 46 C 11.898924 -2.316017 0.000000 0
M  V30 47 K 2.556361 1.665714 0.000000 0
M  V30 48 O 3.378497 1.665714 0.000000 0
M  V30 49 C -16.897180 3.308315 0.000000 0
M  V30 50 C -16.897180 2.483315 0.000000 0
M  V30 51 C -16.182709 2.070815 0.000000 0
M  V30 52 C -15.468239 2.483315 0.000000 0
M  V30 53 C -15.468239 3.308315 0.000000 0
M  V30 54 C -16.182709 3.720815 0.000000 0
M  V30 55 O -14.753767 2.070815 0.000000 0
M  V30 56 C -14.039296 2.483315 0.000000 0
M  V30 57 C -14.039296 3.308315 0.000000 0
M  V30 58 C -14.753767 3.720815 0.000000 0
M  V30 59 O -14.753767 4.545815 0.000000 0
M  V30 60 C -13.324825 3.720815 0.000000 0
M  V30 61 C -12.610355 3.308315 0.000000 0
M  V30 62 O -13.324825 4.545815 0.000000 0
M  V30 63 O -13.324825 2.070815 0.000000 0
M  V30 64 C 8.353294 -5.061721 0.000000 0
M  V30 65 C 8.353294 -5.883856 0.000000 0
M  V30 66 C 9.065285 -6.294925 0.000000 0
M  V30 67 C 9.777276 -5.883856 0.000000 0
M  V30 68 C 9.777276 -5.061721 0.000000 0
M  V30 69 C 9.065285 -4.650653 0.000000 0
M  V30 70 O 10.489266 -6.294925 0.000000 0
M  V30 71 C 11.201257 -5.883856 0.000000 0
M  V30 72 C 11.201257 -5.061721 0.000000 0
M  V30 73 C 10.489266 -4.650653 0.000000 0
M  V30 74 C 11.913247 -4.650653 0.000000 0
M  V30 75 C 12.625237 -5.061721 0.000000 0
M  V30 76 C 13.337228 -4.650653 0.000000 0
M  V30 77 C 14.049218 -5.061721 0.000000 0
M  V30 78 O 11.913247 -3.828517 0.000000 0
M  V30 79 C 14.049218 -5.883856 0.000000 0
M  V30 80 N 14.761209 -6.294925 0.000000 0
M  V30 81 C 15.473200 -5.883856 0.000000 0
M  V30 82 C 15.473200 -5.061721 0.000000 0
M  V30 83 C 14.761209 -4.650653 0.000000 0
M  V30 84 C 16.185190 -6.294925 0.000000 0
M  V30 85 C 16.897180 -5.883856 0.000000 0
M  V30 86 C 16.897180 -5.061721 0.000000 0
M  V30 87 C 16.185190 -4.650653 0.000000 0
M  V30 88 O 10.489266 -3.828517 0.000000 0
M  V30 89 O 11.913247 -6.294925 0.000000 0
M  V30 90 O 13.337228 -6.294925 0.000000 0
M  V30 91 C 13.337228 -7.117061 0.000000 0
M  V30 92 C 12.625237 -7.528128 0.000000 0
M  V30 93 C 12.625237 -8.350264 0.000000 0
M  V30 94 C 11.913247 -8.761332 0.000000 0
M  V30 95 C -13.502647 -2.406532 0.000000 0
M  V30 96 C -13.502647 -3.231532 0.000000 0
M  V30 97 C -12.788176 -3.644032 0.000000 0
M  V30 98 C -12.073706 -3.231532 0.000000 0
M  V30 99 C -12.073706 -2.406532 0.000000 0
M  V30 100 C -12.788176 -1.994032 0.000000 0
M  V30 101 O -11.359235 -3.644032 0.000000 0
M  V30 102 C -10.644764 -3.231532 0.000000 0
M  V30 103 C -10.644764 -2.406532 0.000000 0
M  V30 104 C -11.359235 -1.994032 0.000000 0
M  V30 105 O -11.359235 -1.169032 0.000000 0
M  V30 106 C -9.930292 -1.994032 0.000000 0
M  V30 107 C -9.215822 -2.406532 0.000000 0
M  V30 108 O -9.930292 -1.169032 0.000000 0
M  V30 109 O -9.930292 -3.644032 0.000000 0
M  V30 110 C 8.095482 7.528128 0.000000 0
M  V30 111 C 8.095482 6.705993 0.000000 0
M  V30 112 C 8.807473 6.294925 0.000000 0
M  V30 113 C 9.519463 6.705993 0.000000 0
M  V30 114 C 9.519463 7.528128 0.000000 0
M  V30 115 C 8.807473 7.939196 0.000000 0
M  V30 116 O 10.231453 6.294925 0.000000 0
M  V30 117 C 10.943444 6.705993 0.000000 0
M  V30 118 C 10.943444 7.528128 0.000000 0
M  V30 119 C 10.231453 7.939196 0.000000 0
M  V30 120 C 11.655434 7.939196 0.000000 0
M  V30 121 C 12.367425 7.528128 0.000000 0
M  V30 122 C 13.079416 7.939196 0.000000 0
M  V30 123 C 13.791406 7.528128 0.000000 0
M  V30 124 O 11.655434 8.761332 0.000000 0
M  V30 125 C 13.791406 6.705993 0.000000 0
M  V30 126 N 14.503396 6.294925 0.000000 0
M  V30 127 C 15.215387 6.705993 0.000000 0
M  V30 128 C 15.215387 7.528128 0.000000 0
M  V30 129 C 14.503396 7.939196 0.000000 0
M  V30 130 C 15.927377 6.294925 0.000000 0
M  V30 131 C 16.639367 6.705993 0.000000 0
M  V30 132 C 16.639367 7.528128 0.000000 0
M  V30 133 C 15.927377 7.939196 0.000000 0
M  V30 134 O 10.231453 8.761332 0.000000 0
M  V30 135 O 11.655434 6.294925 0.000000 0
M  V30 136 O 13.079416 6.294925 0.000000 0
M  V30 137 C 13.079416 5.472788 0.000000 0
M  V30 138 C 12.367425 5.061721 0.000000 0
M  V30 139 C 12.367425 4.239585 0.000000 0
M  V30 140 C 11.655434 3.828517 0.000000 0
M  V30 141 C -2.088560 2.095443 0.000000 0
M  V30 142 C -1.376569 1.684375 0.000000 0
M  V30 143 C -1.376569 0.862240 0.000000 0
M  V30 144 N -0.664579 0.451172 0.000000 0
M  V30 145 C 0.047412 0.862240 0.000000 0
M  V30 146 C 0.047412 1.684375 0.000000 0
M  V30 147 C -0.664579 2.095443 0.000000 0
M  V30 148 C 0.759402 0.451172 0.000000 0
M  V30 149 C 1.471392 0.862240 0.000000 0
M  V30 150 C 1.471392 1.684375 0.000000 0
M  V30 151 C 0.759402 2.095443 0.000000 0
M  V30 152 O -2.088560 0.451172 0.000000 0
M  V30 153 C -2.088560 -0.370964 0.000000 0
M  V30 154 C -2.800551 -0.782031 0.000000 0
M  V30 155 C -2.800551 -1.604167 0.000000 0
M  V30 156 C -3.512541 -2.015235 0.000000 0
M  V30 157 H -2.803031 1.682943 0.000000 0
M  V30 158 O -2.088560 2.920443 0.000000 0
M  V30 END ATOM
M  V30 BEGIN BOND
M  V30 1 2 1 2
M  V30 2 1 2 3
M  V30 3 2 3 4
M  V30 4 1 4 5
M  V30 5 2 5 6
M  V30 6 1 6 1
M  V30 7 1 4 7
M  V30 8 1 7 8
M  V30 9 1 8 9
M  V30 10 2 9 10
M  V30 11 1 10 5
M  V30 12 1 10 11
M  V30 13 1 9 12
M  V30 14 1 12 13
M  V30 15 2 12 14
M  V30 16 2 8 15
M  V30 17 2 16 17
M  V30 18 1 17 18
M  V30 19 2 18 19
M  V30 20 1 19 20
M  V30 21 2 20 21
M  V30 22 1 21 16
M  V30 23 1 19 22
M  V30 24 1 22 23
M  V30 25 2 23 24
M  V30 26 1 24 25
M  V30 27 1 25 20
M  V30 28 1 24 26
M  V30 29 1 26 27
M  V30 30 2 27 28
M  V30 31 1 28 29
M  V30 32 2 26 30
M  V30 33 1 29 31
M  V30 34 2 31 32
M  V30 35 1 32 33
M  V30 36 2 33 34
M  V30 37 1 34 35
M  V30 38 2 35 29
M  V30 39 1 33 36
M  V30 40 2 36 37
M  V30 41 1 37 38
M  V30 42 2 38 39
M  V30 43 1 39 34
M  V30 44 2 25 40
M  V30 45 1 23 41
M  V30 46 1 31 42
M  V30 47 1 42 43
M  V30 48 1 43 44
M  V30 49 1 44 45
M  V30 50 1 45 46
M  V30 51 1 47 48
M  V30 52 2 49 50
M  V30 53 1 50 51
M  V30 54 2 51 52
M  V30 55 1 52 53
M  V30 56 2 53 54
M  V30 57 1 54 49
M  V30 58 1 52 55
M  V30 59 1 55 56
M  V30 60 1 56 57
M  V30 61 1 57 58
M  V30 62 1 58 53
M  V30 63 2 58 59
M  V30 64 1 57 60
M  V30 65 1 60 61
M  V30 66 2 60 62
M  V30 67 2 56 63
M  V30 68 2 64 65
M  V30 69 1 65 66
M  V30 70 2 66 67
M  V30 71 1 67 68
M  V30 72 2 68 69
M  V30 73 1 69 64
M  V30 74 1 67 70
M  V30 75 1 70 71
M  V30 76 1 71 72
M  V30 77 2 72 73
M  V30 78 1 73 68
M  V30 79 1 72 74
M  V30 80 1 74 75
M  V30 81 2 75 76
M  V30 82 1 76 77
M  V30 83 2 74 78
M  V30 84 1 77 79
M  V30 85 2 79 80
M  V30 86 1 80 81
M  V30 87 2 81 82
M  V30 88 1 82 83
M  V30 89 2 83 77
M  V30 90 1 81 84
M  V30 91 2 84 85
M  V30 92 1 85 86
M  V30 93 2 86 87
M  V30 94 1 87 82
M  V30 95 1 73 88
M  V30 96 2 71 89
M  V30 97 1 79 90
M  V30 98 1 90 91
M  V30 99 1 91 92
M  V30 100 1 92 93
M  V30 101 1 93 94
M  V30 102 2 95 96
M  V30 103 1 96 97
M  V30 104 2 97 98
M  V30 105 1 98 99
M  V30 106 2 99 100
M  V30 107 1 100 95
M  V30 108 1 98 101
M  V30 109 1 101 102
M  V30 110 2 102 103
M  V30 111 1 103 104
M  V30 112 1 104 99
M  V30 113 2 104 105
M  V30 114 1 103 106
M  V30 115 1 106 107
M  V30 116 2 106 108
M  V30 117 1 102 109
M  V30 118 2 110 111
M  V30 119 1 111 112
M  V30 120 2 112 113
M  V30 121 1 113 114
M  V30 122 2 114 115
M  V30 123 1 115 110
M  V30 124 1 113 116
M  V30 125 1 116 117
M  V30 126 1 117 118
M  V30 127 1 118 119
M  V30 128 1 119 114
M  V30 129 1 118 120
M  V30 130 1 120 121
M  V30 131 2 121 122
M  V30 132 1 122 123
M  V30 133 2 120 124
M  V30 134 1 123 125
M  V30 135 2 125 126
M  V30 136 1 126 127
M  V30 137 2 127 128
M  V30 138 1 128 129
M  V30 139 2 129 123
M  V30 140 1 127 130
M  V30 141 2 130 131
M  V30 142 1 131 132
M  V30 143 2 132 133
M  V30 144 1 133 128
M  V30 145 2 119 134
M  V30 146 2 117 135
M  V30 147 1 125 136
M  V30 148 1 136 137
M  V30 149 1 137 138
M  V30 150 1 138 139
M  V30 151 1 139 140
M  V30 152 1 141 142
M  V30 153 1 142 143
M  V30 154 2 143 144
M  V30 155 1 144 145
M  V30 156 2 145 146
M  V30 157 1 146 147
M  V30 158 2 147 142
M  V30 159 1 145 148
M  V30 160 2 148 149
M  V30 161 1 149 150
M  V30 162 2 150 151
M  V30 163 1 151 146
M  V30 164 1 143 152
M  V30 165 1 152 153
M  V30 166 1 153 154
M  V30 167 1 154 155
M  V30 168 1 155 156
M  V30 169 1 141 157
M  V30 170 2 141 158
M  V30 END BOND
M  V30 BEGIN SGROUP
M  V30 1 SUP 1 ATOMS=(2 47 48) LABEL=KOH
M  V30 2 GEN 2 ATOMS=(45 1 2 3 4 5 6 7 8 9 10 11 12 13 14 15 49 50 51 52 53 -
M  V30 54 55 56 57 58 59 60 61 62 63 95 96 97 98 99 100 101 102 103 104 105 -
M  V30 106 107 108 109) CONNECT=HT BRKXYZ=(9 -5.090095 5.320228 0 -5.090095 -
M  V30 -4.957300 0 0 0 0) BRKXYZ=(9 -17.494177 -5.023159 0 -17.494177 -
M  V30 5.277259 0 0 0 0)
M  V30 END SGROUP
M  V30 END CTAB
M  END
